# Supplementary material
Source: publisher figshare collection journal article supplement (https://gsajournals.figshare.com/ndownloader/files/24527363)
Supplement: Supplementary file 1 [file 24527363]

## Sheet: Sheet1
	Table S5. 86 AFB1 resistant genes grouped according GO Process.
	GO-term	Cluster Percentage*	Genome Percentage#	Genes annotated to the term
	Cellular response to DNA damage stimulus	22 genes, 25.3%	355 genes, 5.0%	RAD4, CSM2, RAD23, RAD54, MMS4, DPB3, RAD55, RAD1, REV1, RAD18,
	DNA repair	20 genes, 23.0%	304 genes, 4.2%	CKB2, PSY3, REV3, FUM1, CKB1, BLM10, RAD2, RAD10, RAD17, NUP60,
	Translesion synthesis	7 genes, 8.0%	18 genes, 0.3%	RAD5, PSY2
	DNA synthesis involved in DNA repair	7 genes, 8.0%	20 genes, 0.3%
	Error-free translesion synthesis	6 genes, 6.9%	12 genes, 0.2%
	Cellular response to stress	29 genes, 33.3%	789 genes, 11.0%
	Postreplication repair	7 genes, 8.0%	30 genes, 0.4%
	Response to stress	29 genes, 33.3%	843 genes, 11.8%
	DNA metabolic process	23 genes, 26.4%	550 genes, 7.7%
	Double-strand break repair	12 genes, 13.8%	140 genes, 2.0%
	Error-prone translesion synthesis	5 genes, 5.7%	11 genes, 0.2%
	Cellular response to stimulus	34 genes, 39.1%	1138 genes, 15.9%
	Response to stimulus	35 genes, 40.2%	1319 genes, 18.4%
	Meiotic cell cycle process	14 genes, 16.1%	275 genes, 3.8%
	DNA biosynthetic process	9 genes, 10.3%	113 genes, 1.6%
	Meiotic cell cycle	14 genes, 16.1%	323 genes, 4.5%
	Double-strand break repair via synthesis-dependent strand annealing	4 genes, 4.6%	16 genes, 0.2%
	Nucleotide-excision repair, DNA incision	3 genes, 3.4%	8 genes, 0.1%
	Reproductive process	16 genes, 18.4%	483 genes, 6.7%
	DNA recombinase assembly	3 genes, 3.4%	11 genes, 0.2%
	Reproduction	16 genes, 18.4%	503 genes, 7.0%
	Nucleobase-containing compound biosynthetic process	25 genes, 28.7%	1019 genes, 14.2%
	DNA repair complex assembly	3 genes, 3.4%	12 genes, 0.2%
	Double-strand break repair via homologous recombination	6 genes, 6.9%	81 genes, 1.1%
	Error-free postreplication DNA repair	2 genes, 2.3%	3 genes, 0.0%
	Positive regulation of DNA metabolic process	4 genes, 4.6%	31 genes, 0.4%
	Cell cycle process	18 genes, 20.7%	651 genes, 9.1%
	Cellular process	76 genes, 87.4%	5200 genes, 72.6%
	Recombinational repair	6 genes, 6.9%	90 genes, 1.3%
	Cellular macromolecule metabolic process	49 genes, 56.3%	2800 genes, 39.1%
	Cellular component assembly	22 genes, 25.3%	897 genes, 12.5%
	Aromatic compound biosynthetic process	25 genes, 28.7%	1088 genes, 15.2%
	Double-strand break repair via single-strand annealing, removal of nonhomologous ends	2 genes, 2.3%	4 genes, 0.1%
	Nucleotide-excision repair, DNA incision, 5'-to lesion	2 genes, 2.3%	4 genes, 0.1%
	Nucleotide-excision repair	5 genes, 5.7%	63 genes, 0.9%
	Heterocycle biosynthetic process	25 genes, 28.7%	1101 genes, 15.4%
	Reciprocal meiotic recombination	5 genes, 5.7%	65 genes, 0.9%
	Meiotic nuclear division	7 genes, 8.0%	133 genes, 1.9%
	Homologous recombination	5 genes, 5.7%	66 genes, 0.9%
	Peptidyl-threonine phosphorylation	3 genes, 3.4%	18 genes, 0.3%
	Peptidyl-threonine modification	3 genes, 3.4%	18 genes, 0.3%
	Metabolic process	66 genes, 75.9%	4297 genes, 60.0%
	DNA conformation change	7 genes, 8.0%	145 genes, 2.0%
	Nucleobase-containing compound metabolic process	38 genes, 43.7%	2052 genes, 28.6%
	Organic cyclic compound biosynthetic process	25 genes, 28.7%	1148 genes, 16.0%
	Negative regulation of transferase activity	4 genes, 4.6%	45 genes, 0.6%
	Removal of nonhomologous ends	2 genes, 2.3%	6 genes, 0.1%
	Meiosis I cell cycle process	6 genes, 6.9%	112 genes, 1.6%
	Mismatch repair	3 genes, 3.4%	23 genes, 0.3%
	Cell cycle	19 genes, 21.8%	795 genes, 11.1%
	DNA amplification	2 genes, 2.3%	7 genes, 0.1%
	Double-strand break repair via single-strand annealing	2 genes, 2.3%	7 genes, 0.1%
	Cellular protein modification process	20 genes, 23.0%	868 genes, 12.1%
	Protein modification process	20 genes, 23.0%	868 genes, 12.1%
	Cellular developmental process	10 genes, 11.5%	302 genes, 4.2%
	DNA recombination	9 genes, 10.3%	254 genes, 3.5%
	Organic substance metabolic process	62 genes, 71.3%	4066 genes, 56.7%
	Cellular response to drug	3 genes, 3.4%	26 genes, 0.4%
	Negative regulation of cellular process	17 genes, 19.5%	698 genes, 9.7%
	Heteroduplex formation	2 genes, 2.3%	8 genes, 0.1%
	Cellular aromatic compound metabolic process	38 genes, 43.7%	2136 genes, 29.8%
	Negative regulation of catalytic activity	5 genes, 5.7%	88 genes, 1.2%
	Glycoprotein metabolic process	5 genes, 5.7%	89 genes, 1.2%
	Heterocycle metabolic process	38 genes, 43.7%	2148 genes, 30.0%
	Developmental process	10 genes, 11.5%	314 genes, 4.4%
	Nuclear division	9 genes, 10.3%	264 genes, 3.7%
	Macromolecule metabolic process	52 genes, 59.8%	3257 genes, 45.5%
	Nucleic acid metabolic process	33 genes, 37.9%	1790 genes, 25.0%
	Regulation of protein modification process	8 genes, 9.2%	219 genes, 3.1%
	Meiotic mismatch repair	2 genes, 2.3%	9 genes, 0.1%
	Resolution of meiotic recombination intermediates	2 genes, 2.3%	9 genes, 0.1%
	Macromolecule biosynthetic process	34 genes, 39.1%	1870 genes, 26.1%
	Macromolecule modification	22 genes, 25.3%	1037 genes, 14.5%
	Meiosis I	5 genes, 5.7%	93 genes, 1.3%
	Regulation of transferase activity	6 genes, 6.9%	133 genes, 1.9%
	Regulation of cellular process	31 genes, 35.6%	1662 genes, 23.2%
	Organelle fission	9 genes, 10.3%	276 genes, 3.9%
	Negative regulation of protein kinase activity	3 genes, 3.4%	31 genes, 0.4%
	Regulation of transcription by RNA polymerase III	2 genes, 2.3%	10 genes, 0.1%
	N-glycan processing	2 genes, 2.3%	10 genes, 0.1%
	Nitrogen compound metabolic process	57 genes, 65.5%	3712 genes, 51.8%
	Regulation of catalytic activity	11 genes, 12.6%	385 genes, 5.4%
	Negative regulation of kinase activity	3 genes, 3.4%	32 genes, 0.4%
	Cellular component organization	37 genes, 42.5%	2122 genes, 29.6%
	Negative regulation of protein modification process	4 genes, 4.6%	63 genes, 0.9%
	Primary metabolic process	59 genes, 67.8%	3897 genes, 54.4%
	Organic cyclic compound metabolic process	38 genes, 43.7%	2205 genes, 30.8%
	Carbohydrate derivative metabolic process	11 genes, 12.6%	390 genes, 5.4%
	Protein-containing complex assembly	15 genes, 17.2%	624 genes, 8.7%
	Cell aging	4 genes, 4.6%	66 genes, 0.9%
	Regulation of protein kinase activity	5 genes, 5.7%	104 genes, 1.5%
	Negative regulation of protein phosphorylation	3 genes, 3.4%	35 genes, 0.5%
	Cellular macromolecule biosynthetic process	33 genes, 37.9%	1855 genes, 25.9%
	Negative regulation of molecular function	5 genes, 5.7%	105 genes, 1.5%
	DNA topological change	2 genes, 2.3%	12 genes, 0.2%
	Response to UV	2 genes, 2.3%	12 genes, 0.2%
	Aging	4 genes, 4.6%	68 genes, 0.9%
	DNA geometric change	4 genes, 4.6%	69 genes, 1.0%
	Regulation of protein serine/threonine kinase activity	4 genes, 4.6%	69 genes, 1.0%
	Cellular metabolic process	61 genes, 70.1%	4114 genes, 57.4%
	Negative regulation of phosphorylation	3 genes, 3.4%	37 genes, 0.5%

## Sheet: Sheet2
TABLE S6. 86 GENES IDENTIFIED IN SCREENS FOR AFB1 RESISTANCE GROUPED ACCORDING GO PROCESS
GO-term	Cluster Percentage*	Genome Percentage#	Genes annotated to the term
Cellular response to DNA damage stimulus	22 genes, 25.3%	355 genes, 5.0%	RAD4, CSM2, RAD23, RAD54, MMS4, DPB3, RAD55, RAD1, REV1, RAD18,
			CKB2, PSY3, REV3, FUM1, CKB1, BLM10, RAD2, RAD10, RAD17, NUP60,
			RAD5, PSY2
DNA repair	20 genes, 23.0%	304 genes, 4.2%	RAD4, CSM2, RAD23, RAD54, MMS4, DPB3, RAD55, REV1, RAD1, RAD18,
			PSY3, REV3, FUM1, BLM10, RAD2, RAD10, RAD17, NUP60, RAD5, PSY2
Translesion synthesis	7 genes, 8.0%	18 genes, 0.3%	CSM2, REV1, RAD5, DPB3, RAD18, PSY3, REV3
DNA synthesis involved in DNA repair	7 genes, 8.0%	20 genes, 0.3%	CSM2, REV1, RAD5, DPB3, RAD18, PSY3, REV3
Error-free translesion synthesis	6 genes, 6.9%	12 genes, 0.2%	CSM2, REV1, RAD5, RAD18, PSY3, REV3
Cellular response to stress	29 genes, 33.3%	789 genes, 11.0%	RAD4, CUE1, CSM2, RAD23, RAD54, MMS4, YIH1, DPB3, GRE3, RAD55,
			RAD1, REV1, TCM62, SSM4, CKB2, RAD18, PSY3, FUM1, REV3, SVF1,
			CKB1, BLM10, RAD2, RAD10, RAD17, NUP60, RAD5, TRX3, PSY2
Postreplication repair	7 genes, 8.0%	30 genes, 0.4%	CSM2, REV1, RAD5, DPB3, RAD18, PSY3, REV3
Response to stress	29 genes, 33.3%	843 genes, 11.8%	RAD4, CUE1, CSM2, RAD23, RAD54, MMS4, YIH1, DPB3, GRE3, RAD55,
			RAD1, REV1, TCM62, SSM4, CKB2, RAD18, PSY3, FUM1, REV3, SVF1,
			CKB1, BLM10, RAD2, RAD10, RAD17, NUP60, RAD5, TRX3, PSY2
DNA metabolic process	23 genes, 26.4%	550 genes, 7.7%	RAD4, FKH2, CSM2, RAD23, RAD54, MMS4, DPB3, RAD55, RAD1, REV1, RNR3, RAD18, PSY3, REV3, FUM1, CLB5, BLM10, RAD2, RAD10, RAD17,
			NUP60, RAD5, PSY2
Double-strand break repair	12 genes, 13.8%	140 genes, 2.0%	RAD1, PSY3, REV3, RAD10, CSM2, RAD17, NUP60, RAD5, RAD54, MMS4,
			PSY2, RAD55
Error-prone translesion synthesis	5 genes, 5.7%	11 genes, 0.2%	REV1, RAD5, DPB3, RAD18, REV3
Cellular response to stimulus	34 genes, 39.1%	1138 genes, 15.9%	RAD4, GRE3, PSY3, SVF1, RAD2, MRPL35, RAD10, BIT2, NUP60, RAD5,
			DAL82, TRX3, PSY2, CUE1, CSM2, MMS4, RAD54, HXK2, RAD23, DPB3,
			YIH1, TRM9, RAD55, REV1, RAD1, TCM62, SSM4, RAD18, CKB2, REV3,
			FUM1, CKB1, BLM10, RAD17
Response to stimulus	35 genes, 40.2%	1319 genes, 18.4%	ATO3, RAD4, GRE3, PSY3, SVF1, RAD2, MRPL35, RAD10, BIT2, NUP60, RAD5, DAL82, TRX3, PSY2, CUE1, CSM2, MMS4, RAD54, HXK2, RAD23, DPB3, YIH1, TRM9, RAD55, REV1, RAD1, TCM62, SSM4, RAD18, CKB2, REV3, FUM1, CKB1, BLM10, RAD17
Meiotic cell cycle process	14 genes, 16.1%	275 genes, 3.8%	RAD1, VPS13, DIT1, HHF1, CLB5, SPO1, RAD10, CSM2, RAD17, RAD54,
			MMS4, SWM1, PSY2, RAD55
DNA biosynthetic process	9 genes, 10.3%	113 genes, 1.6%	RAD1, REV1, RAD18, PSY3, REV3, RAD10, CSM2, RAD5, DPB3
Meiotic cell cycle	14 genes, 16.1%	323 genes, 4.5%	RAD1, VPS13, DIT1, HHF1, CLB5, SPO1, RAD10, CSM2, RAD17, RAD54,
			MMS4, SWM1, PSY2, RAD55
Double-strand break repair via synthesis-dependent strand annealing	4 genes, 4.6%	16 genes, 0.2%	CSM2, RAD54, PSY3, RAD55
Nucleotide-excision repair, DNA incision	3 genes, 3.4%	8 genes, 0.1%	RAD1, RAD10, RAD2
Reproductive process	16 genes, 18.4%	483 genes, 6.7%	DIT1, HHF1, SPO1, CSM2, RAD54, MMS4, SCW10, SWM1, RAD55, RAD1,
			VPS13, MYO4, CLB5, RAD10, RAD17, PSY2
DNA recombinase assembly	3 genes, 3.4%	11 genes, 0.2%	CSM2, PSY3, RAD55
Reproduction	16 genes, 18.4%	503 genes, 7.0%	DIT1, HHF1, SPO1, CSM2, RAD54, MMS4, SCW10, SWM1, RAD55, RAD1,
			VPS13, MYO4, CLB5, RAD10, RAD17, PSY2
Nucleobase-containing compound biosynthetic process	25 genes, 28.7%	1019 genes, 14.2%	RAD4, FKH2, HHF1, ATP15, CSM2, RAD23, HXK2, DPB3, RAD1, REV1,
			RNR3, RAD18, CKB2, MIS1, PSY3, REV3, CKB1, RAD2, RAD10, NUP60, RAD5, DAL82, DST1, PYK2, ELP6
DNA repair complex assembly	3 genes, 3.4%	12 genes, 0.2%	CSM2, PSY3, RAD55
Double-strand break repair via homologous recombination	6 genes, 6.9%	81 genes, 1.1%	CSM2, RAD1, RAD54, PSY3, REV3, RAD55
Error-free postreplication DNA repair	2 genes, 2.3%	3 genes, 0.0%	RAD5, RAD18
Positive regulation of DNA metabolic process	4 genes, 4.6%	31 genes, 0.4%	FKH2, RAD54, CLB5, PSY2
Cell cycle process	18 genes, 20.7%	651 genes, 9.1%	RVS167, FKH2, DIT1, HHF1, SPO1, MNN10, CSM2, RAD54, MMS4, SWM1, BCK2, RAD55, RAD1, VPS13, CLB5, RAD10, RAD17, PSY2
Cellular process	76 genes, 87.4%	5200 genes, 72.6%	RVS167, RAD4, FKH2, GTB1, DUS1, GRE3, BCK2, VOA1, GLO1, VPS13,
			MIS1, CLB5, SVF1, NUP60, RAD5, DAL82, DST1, DET1, PYK2, PSY2, PPG1, SPO1, ATP15, CSM2, ATG29, RAD23, DPB3, RAD1, RNR3, SSM4, FUM1,
			REV3, BLM10, YND1, HHF1, RPL9A, RIT1, PET10, LAG2, SCW10, PEX3,
			PSY3, MET6, RAD10, MRPL35, RAD2, BIT2, TES1, CLG1, TRX3, RAV1,
			RPN10, RPS4A, DIT1, CUE1, MNN10, RAD54, MMS4, HXK2, YIH1, SWM1, TRM9, RAD55, ATP11, REV1, TCM62, SHH3, RAD18, CKB2, ROT2, MYO4, CKB1, RAD17, TMA20, AKL1, ELP6
Recombinational repair	6 genes, 6.9%	90 genes, 1.3%	CSM2, RAD1, RAD54, PSY3, REV3, RAD55
Cellular macromolecule metabolic process	49 genes, 56.3%	2800 genes, 39.1%	RAD4, FKH2, HHF1, RPL9A, RIT1, GTB1, LAG2, PSY3, CLB5, RAD2, MRPL35, RAD10, NUP60, CLG1, RAD5, DAL82, DST1, PSY2, RPN10, RPS4A, PPG1, CUE1, MNN10, CSM2, MMS4, RAD54, HXK2, RAD23, YIH1, DPB3, SWM1, TRM9, RAD55, RAD1, REV1, RNR3, SSM4, RAD18, CKB2, ROT2, REV3,
			FUM1, CKB1, BLM10, RAD17, TMA20, AKL1, YND1, ELP6
Cellular component assembly	22 genes, 25.3%	897 genes, 12.5%	RVS167, DIT1, HHF1, SPO1, MNN10, CSM2, ATG29, SWM1, VOA1, ATP11, RAD55, VPS13, TCM62, PSY3, CLB5, BLM10, TMA20, RAD5, AKL1, DST1,
			RAV1, RPN10
Aromatic compound biosynthetic process	25 genes, 28.7%	1088 genes, 15.2%	RAD4, FKH2, HHF1, ATP15, CSM2, RAD23, HXK2, DPB3, RAD1, REV1,
			RNR3, RAD18, CKB2, MIS1, PSY3, REV3, CKB1, RAD2, RAD10, NUP60, RAD5, DAL82, DST1, PYK2, ELP6
Double-strand break repair via single-strand annealing, removal of nonhomologous ends	2 genes, 2.3%	4 genes, 0.1%	RAD1, RAD10
Nucleotide-excision repair, DNA incision, 5'-to lesion	2 genes, 2.3%	4 genes, 0.1%	RAD1, RAD10
Nucleotide-excision repair	5 genes, 5.7%	63 genes, 0.9%	RAD1, RAD4, RAD23, RAD10, RAD2
Heterocycle biosynthetic process	25 genes, 28.7%	1101 genes, 15.4%	RAD4, FKH2, HHF1, ATP15, CSM2, RAD23, HXK2, DPB3, RAD1, REV1, RNR3, RAD18, CKB2, MIS1, PSY3, REV3, CKB1, RAD2, RAD10, NUP60, RAD5, DAL82, DST1, PYK2, ELP6
Reciprocal meiotic recombination	5 genes, 5.7%	65 genes, 0.9%	RAD1, RAD17, MMS4, RAD54, RAD55
Meiotic nuclear division	7 genes, 8.0%	133 genes, 1.9%	CSM2, RAD1, RAD17, MMS4, RAD54, PSY2, RAD55
Homologous recombination	5 genes, 5.7%	66 genes, 0.9%	RAD1, RAD17, MMS4, RAD54, RAD55
Peptidyl-threonine phosphorylation	3 genes, 3.4%	18 genes, 0.3%	AKL1, CKB2, CKB1
Peptidyl-threonine modification	3 genes, 3.4%	18 genes, 0.3%	AKL1, CKB2, CKB1
Metabolic process	66 genes, 75.9%	4297 genes, 60.0%	RAD4, FKH2, GTB1, DUS1, GRE3, GFD1, BCK2, GLO1, MIS1, CLB5, NUP60, RAD5, DAL82, DST1, DET1, PYK2, PSY2, PPG1, SPO1, ATP15, CSM2,
			ATG29, RAD23, DPB3, RAD1, RNR3, SSM4, FUM1, REV3, BLM10, YND1,
			HHF1, RPL9A, PET10, RIT1, LAG2, SCW10, PSY3, RAD10, MRPL35, RAD2, MET6, TES1, CLG1, TRX3, RPN10, RPS4A, CUE1, MNN10, HXK2, RAD54, MMS4, YIH1, SWM1, TRM9, RAD55, REV1, SHH3, CKB2, RAD18, ROT2,
			CKB1, RAD17, TMA20, AKL1, ELP6
DNA conformation change	7 genes, 8.0%	145 genes, 2.0%	RAD5, RAD4, MMS4, RAD54, RAD18, HHF1, RAD10
Nucleobase-containing compound metabolic process	38 genes, 43.7%	2052 genes, 28.6%	RAD4, FKH2, HHF1, RIT1, DUS1, MIS1, PSY3, CLB5, RAD2, RAD10, TES1, NUP60, RAD5, DAL82, DST1, PYK2, PSY2, ATP15, CSM2, MMS4, RAD54,
			HXK2, RAD23, DPB3, TRM9, RAD55, REV1, RAD1, RNR3, SHH3, RAD18,
			CKB2, REV3, FUM1, CKB1, BLM10, RAD17, ELP6
Organic cyclic compound biosynthetic process	25 genes, 28.7%	1148 genes, 16.0%	RAD4, FKH2, HHF1, ATP15, CSM2, RAD23, HXK2, DPB3, RAD1, REV1, RNR3, RAD18, CKB2, MIS1, PSY3, REV3, CKB1, RAD2, RAD10, NUP60, RAD5,DAL82, DST1, PYK2, ELP6
Negative regulation of transferase activity	4 genes, 4.6%	45 genes, 0.6%	LAG2, YIH1, CKB2, CKB1
Removal of nonhomologous ends	2 genes, 2.3%	6 genes, 0.1%	RAD1, RAD10
Meiosis I cell cycle process	6 genes, 6.9%	112 genes, 1.6%	RAD1, RAD17, MMS4, RAD54, RAD10, RAD55
Mismatch repair	3 genes, 3.4%	23 genes, 0.3%	RAD1, RAD4, RAD10
Cell cycle	19 genes, 21.8%	795 genes, 11.1%	RVS167, FKH2, DIT1, HHF1, SPO1, MNN10, CSM2, RAD54, MMS4, SWM1, BCK2, RAD55, RAD1, VPS13, CLB5, RAD10, RAD17, CLG1, PSY2
DNA amplification	2 genes, 2.3%	7 genes, 0.1%	RAD1, RAD10
Double-strand break repair via single-strand annealing	2 genes, 2.3%	7 genes, 0.1%	RAD1, RAD10
Cellular protein modification process	20 genes, 23.0%	868 genes, 12.1%	HHF1, PPG1, MNN10, RIT1, LAG2, RAD23, YIH1, SWM1, SSM4, RAD18,
			CKB2, CLB5, CKB1, NUP60, CLG1, AKL1, RAD5, YND1, ELP6, PSY2
Protein modification process	20 genes, 23.0%	868 genes, 12.1%	HHF1, PPG1, MNN10, RIT1, LAG2, RAD23, YIH1, SWM1, SSM4, RAD18,
			CKB2, CLB5, CKB1, NUP60, CLG1, AKL1, RAD5, YND1, ELP6, PSY2
Cellular developmental process	10 genes, 11.5%	302 genes, 4.2%	VPS13, SSM4, MYO4, DIT1, HHF1, SPO1, LAG2, HXK2, DPB3, SWM1
DNA recombination	9 genes, 10.3%	254 genes, 3.5%	RAD1, PSY3, REV3, RAD10, RAD17, CSM2, RAD54, MMS4, RAD55
Organic substance metabolic process	62 genes, 71.3%	4066 genes, 56.7%	RAD4, FKH2, HHF1, RPL9A, RIT1, GTB1, LAG2, DUS1, SCW10, GRE3,
			GFD1, BCK2, GLO1, MIS1, PSY3, CLB5, MET6, RAD2, MRPL35, RAD10,
			TES1, NUP60, CLG1, RAD5, DAL82, DST1, PYK2, PSY2, RPN10, RPS4A,
			CUE1, PPG1, SPO1, MNN10, ATP15, CSM2, MMS4, RAD54, HXK2, RAD23, YIH1, DPB3, TRM9, SWM1, RAD55, RAD1, REV1, RNR3, SSM4, SHH3,
			ROT2, RAD18, CKB2, FUM1, REV3, CKB1, BLM10, RAD17, TMA20, AKL1,
			YND1, ELP6
Cellular response to drug	3 genes, 3.4%	26 genes, 0.4%	CKB2, TRM9, CKB1
Negative regulation of cellular process	17 genes, 19.5%	698 genes, 9.7%	RAD4, FKH2, HHF1, LAG2, RAD23, MMS4, HXK2, YIH1, DPB3, CKB2, CKB1, MRPL35, RAD17, NUP60, AKL1, DST1, PSY2
Heteroduplex formation	2 genes, 2.3%	8 genes, 0.1%	RAD54, RAD55
Cellular aromatic compound metabolic process	38 genes, 43.7%	2136 genes, 29.8%	RAD4, FKH2, HHF1, RIT1, DUS1, MIS1, PSY3, CLB5, RAD2, RAD10, TES1, NUP60, RAD5, DAL82, DST1, PYK2, PSY2, ATP15, CSM2, MMS4, RAD54,
			HXK2, RAD23, DPB3, TRM9, RAD55, REV1, RAD1, RNR3, SHH3, RAD18, CKB2, REV3, FUM1, CKB1, BLM10, RAD17, ELP6
Negative regulation of catalytic activity	5 genes, 5.7%	88 genes, 1.2%	LAG2, YIH1, CKB2, CKB1, MRPL35
Glycoprotein metabolic process	5 genes, 5.7%	89 genes, 1.2%	RAD23, ROT2, YND1, MNN10, GTB1
Heterocycle metabolic process	38 genes, 43.7%	2148 genes, 30.0%	RAD4, FKH2, HHF1, RIT1, DUS1, MIS1, PSY3, CLB5, RAD2, RAD10, TES1, NUP60, RAD5, DAL82, DST1, PYK2, PSY2, ATP15, CSM2, MMS4, RAD54,
			HXK2, RAD23, DPB3, TRM9, RAD55, REV1, RAD1, RNR3, SHH3, RAD18,
			CKB2, REV3, FUM1, CKB1, BLM10, RAD17, ELP6
Developmental process	10 genes, 11.5%	314 genes, 4.4%	VPS13, SSM4, MYO4, DIT1, HHF1, SPO1, LAG2, HXK2, DPB3, SWM1
Nuclear division	9 genes, 10.3%	264 genes, 3.7%	RAD1, CLB5, CSM2, RAD17, RAD54, MMS4, SWM1, PSY2, RAD55
Macromolecule metabolic process	52 genes, 59.8%	3257 genes, 45.5%	RAD4, FKH2, HHF1, RPL9A, RIT1, GTB1, LAG2, DUS1, GFD1, BCK2, PSY3, CLB5, RAD2, MRPL35, RAD10, NUP60, CLG1, RAD5, DAL82, DST1, PSY2, RPN10, RPS4A, PPG1, CUE1, MNN10, CSM2, MMS4, RAD54, HXK2, RAD23, YIH1, DPB3, SWM1, TRM9, RAD55, RAD1, REV1, RNR3, SSM4, RAD18,
			CKB2, ROT2, REV3, FUM1, CKB1, BLM10, RAD17, TMA20, AKL1, YND1,
			ELP6
Nucleic acid metabolic process	33 genes, 37.9%	1790 genes, 25.0%	RAD4, FKH2, HHF1, RIT1, DUS1, PSY3, CLB5, RAD2, RAD10, NUP60,
			RAD5, DAL82, DST1, PSY2, CSM2, MMS4, RAD54, HXK2, RAD23, DPB3,
			TRM9, RAD55, REV1, RAD1, RNR3, CKB2, RAD18, REV3, FUM1, CKB1,
			BLM10, RAD17, ELP6
Regulation of protein modification process	8 genes, 9.2%	219 genes, 3.1%	CKB2, CLB5, CKB1, NUP60, LAG2, CLG1, YIH1, PSY2
Meiotic mismatch repair	2 genes, 2.3%	9 genes, 0.1%	RAD1, RAD10
Resolution of meiotic recombination intermediates	2 genes, 2.3%	9 genes, 0.1%	RAD1, MMS4
Macromolecule biosynthetic process	34 genes, 39.1%	1870 genes, 26.1%	RAD4, FKH2, HHF1, RPL9A, GTB1, PSY3, CLB5, RAD2, MRPL35, RAD10, NUP60, RAD5, DAL82, DST1, RPS4A, MNN10, CSM2, MMS4, HXK2, RAD23, DPB3, YIH1, TRM9, REV1, RAD1, RNR3, RAD18, CKB2, ROT2, REV3, CKB1, TMA20, YND1, ELP6
Macromolecule modification	22 genes, 25.3%	1037 genes, 14.5%	HHF1, PPG1, MNN10, RIT1, LAG2, DUS1, RAD23, YIH1, TRM9, SWM1,
			SSM4, RAD18, CKB2, CLB5, CKB1, NUP60, CLG1, RAD5, AKL1, YND1,
			ELP6, PSY2
Meiosis I	5 genes, 5.7%	93 genes, 1.3%	RAD1, RAD17, MMS4, RAD54, RAD55
Regulation of transferase activity	6 genes, 6.9%	133 genes, 1.9%	CLG1, LAG2, YIH1, CKB2, CLB5, CKB1
Regulation of cellular process	31 genes, 35.6%	1662 genes, 23.2%	RAD4, FKH2, HHF1, LAG2, RAD23, HXK2, RAD54, MMS4, YIH1, DPB3,
			TRM9, SWM1, BCK2, RNR3, VPS13, CKB2, CLB5, CKB1, BLM10, MRPL35, RAD17, BIT2, NUP60, CLG1, AKL1, DAL82, DST1, TRX3, ELP6, PSY2, RAV1
Organelle fission	9 genes, 10.3%	276 genes, 3.9%	RAD1, CLB5, CSM2, RAD17, RAD54, MMS4, SWM1, PSY2, RAD55
Negative regulation of protein kinase activity	3 genes, 3.4%	31 genes, 0.4%	YIH1, CKB2, CKB1
Regulation of transcription by RNA polymerase III	2 genes, 2.3%	10 genes, 0.1%	CKB2, CKB1
N-glycan processing	2 genes, 2.3%	10 genes, 0.1%	ROT2, GTB1
Nitrogen compound metabolic process	57 genes, 65.5%	3712 genes, 51.8%	RAD4, FKH2, HHF1, RPL9A, RIT1, GTB1, LAG2, DUS1, GLO1, MIS1, PSY3, CLB5, MET6, RAD2, MRPL35, RAD10, TES1, NUP60, CLG1, RAD5, DAL82, DST1, PYK2, PSY2, RPN10, RPS4A, CUE1, PPG1, MNN10, ATP15, CSM2, MMS4, RAD54, HXK2, RAD23, YIH1, DPB3, TRM9, SWM1, RAD55, RAD1,
			REV1, RNR3, SSM4, SHH3, RAD18, CKB2, ROT2, FUM1, REV3, CKB1,
			BLM10, RAD17, TMA20, AKL1, YND1, ELP6
Regulation of catalytic activity	11 genes, 12.6%	385 genes, 5.4%	CKB2, CUE1, CLB5, CKB1, BLM10, MRPL35, CLG1, LAG2, RAD54, YIH1,
			PSY2
Negative regulation of kinase activity	3 genes, 3.4%	32 genes, 0.4%	YIH1, CKB2, CKB1
Cellular component organization	37 genes, 42.5%	2122 genes, 29.6%	RVS167, RAD4, FKH2, HHF1, PEX3, SCW10, VOA1, VPS13, PSY3, CLB5,
			RAD10, NUP60, RAD5, DST1, PSY2, RPN10, RAV1, DIT1, SPO1, MNN10,
			CSM2, ATG29, MMS4, RAD54, HXK2, DPB3, SWM1, RAD55, ATP11, RAD1, TCM62, RAD18, MYO4, BLM10, RAD17, TMA20, AKL1
Negative regulation of protein modification process	4 genes, 4.6%	63 genes, 0.9%	LAG2, YIH1, CKB2, CKB1
Primary metabolic process	59 genes, 67.8%	3897 genes, 54.4%	RAD4, FKH2, HHF1, RPL9A, RIT1, GTB1, LAG2, DUS1, SCW10, GRE3,
			MIS1, PSY3, CLB5, MET6, RAD2, MRPL35, RAD10, TES1, NUP60, CLG1,
			RAD5, DAL82, DST1, PYK2, PSY2, RPN10, RPS4A, CUE1, PPG1, SPO1,
			MNN10, ATP15, CSM2, MMS4, RAD54, HXK2, RAD23, YIH1, DPB3, TRM9, SWM1, RAD55, RAD1, REV1, RNR3, SSM4, SHH3, ROT2, RAD18, CKB2,
			FUM1, REV3, CKB1, BLM10, RAD17, TMA20, AKL1, YND1, ELP6
Organic cyclic compound metabolic process	38 genes, 43.7%	2205 genes, 30.8%	RAD4, FKH2, HHF1, RIT1, DUS1, MIS1, PSY3, CLB5, RAD2, RAD10, TES1, NUP60, RAD5, DAL82, DST1, PYK2, PSY2, ATP15, CSM2, MMS4, RAD54, HXK2, RAD23, DPB3, TRM9, RAD55, REV1, RAD1, RNR3, SHH3, RAD18, CKB2, REV3, FUM1, CKB1, BLM10, RAD17, ELP6
Carbohydrate derivative metabolic process	11 genes, 12.6%	390 genes, 5.4%	RNR3, SHH3, ROT2, ATP15, MNN10, GTB1, TES1, HXK2, RAD23, YND1,
			PYK2
Protein-containing complex assembly	15 genes, 17.2%	624 genes, 8.7%	TCM62, RVS167, HHF1, PSY3, BLM10, CSM2, TMA20, RAD5, DST1, SWM1, VOA1, RPN10, RAD55, RAV1, ATP11
Cell aging	4 genes, 4.6%	66 genes, 0.9%	LAG2, HXK2, SSM4, DPB3
Regulation of protein kinase activity	5 genes, 5.7%	104 genes, 1.5%	CLG1, YIH1, CKB2, CLB5, CKB1
Negative regulation of protein phosphorylation	3 genes, 3.4%	35 genes, 0.5%	YIH1, CKB2, CKB1
Cellular macromolecule biosynthetic process	33 genes, 37.9%	1855 genes, 25.9%	RAD4, FKH2, HHF1, RPL9A, PSY3, CLB5, RAD2, MRPL35, RAD10, NUP60, RAD5, DAL82, DST1, RPS4A, MNN10, CSM2, MMS4, HXK2, RAD23, DPB3, YIH1, TRM9, REV1, RAD1, RNR3, CKB2, RAD18, ROT2, REV3, CKB1,
			TMA20, YND1, ELP6
Negative regulation of molecular function	5 genes, 5.7%	105 genes, 1.5%	LAG2, YIH1, CKB2, CKB1, MRPL35
DNA topological change	2 genes, 2.3%	12 genes, 0.2%	RAD4, MMS4
Response to UV	2 genes, 2.3%	12 genes, 0.2%	RAD18, RAD10
Aging	4 genes, 4.6%	68 genes, 0.9%	LAG2, HXK2, SSM4, DPB3
DNA geometric change	4 genes, 4.6%	69 genes, 1.0%	RAD5, RAD54, RAD18, RAD10
Regulation of protein serine/threonine kinase activity	4 genes, 4.6%	69 genes, 1.0%	CLG1, CKB2, CLB5, CKB1
Cellular metabolic process	61 genes, 70.1%	4114 genes, 57.4%	RAD4, FKH2, HHF1, RPL9A, RIT1, PET10, GTB1, LAG2, DUS1, GLO1, MIS1, PSY3, CLB5, MET6, RAD2, MRPL35, RAD10, TES1, NUP60, CLG1, RAD5, DAL82, DST1, DET1, PYK2, PSY2, RPN10, RPS4A, CUE1, PPG1, SPO1,
			MNN10, ATP15, CSM2, ATG29, RAD23, MMS4, RAD54, HXK2, YIH1, DPB3, TRM9, SWM1, RAD55, RAD1, REV1, RNR3, SSM4, SHH3, ROT2, RAD18,
			CKB2, FUM1, REV3, CKB1, BLM10, RAD17, TMA20, AKL1, YND1, ELP6
Negative regulation of phosphorylation	3 genes, 3.4%	37 genes, 0.5%	YIH1, CKB2, CKB1
*Out 86 total genes
#Out of 7166
